# Supplementary material
Source: ML conference proceedings conference paper supplement (https://proceedings.neurips.cc/paper_files/paper/2015/hash/eae27d77ca20db309e056e3d2dcd7d69-Abstract.html)
Supplement: Supplementary file [file eae27d77ca20db309e056e3d2dcd7d69-Supplemental.zip]

## Supplemental Material

### A Proofs

#### A.1 On the connection of ONMF with NNPCA

**Lemma 2.** Let  $\mathcal{E}_\star \triangleq \min_{\mathbf{W} \geq \mathbf{0}, \mathbf{H} \geq \mathbf{0}, \mathbf{W}^\top \mathbf{W} = \mathbf{I}_k} \|\mathbf{M} - \mathbf{W}\mathbf{H}^\top\|_F^2$  be the optimal ONMF approximation error for a given  $m \times n$  real nonnegative matrix  $\mathbf{M}$  and target dimension  $k$ , as defined in (1). Then,

$$\mathcal{E}_\star = \|\mathbf{M}\|_F^2 - \max_{\substack{\mathbf{W} \geq \mathbf{0}_{m \times k} \\ \mathbf{W}^\top \mathbf{W} = \mathbf{I}_k}} \|\mathbf{M}^\top \mathbf{W}\|_F^2, \quad (6)$$

If  $\mathbf{W}_\star$  is a solution of the maximization in (6), then the pair  $\mathbf{W}_\star, \mathbf{H}_\star \triangleq \mathbf{M}^\top \mathbf{W}_\star$  is a feasible solution to the ONMF problem in (1), achieving the minimum error  $\mathcal{E}_\star$ , i.e.,  $\|\mathbf{M} - \mathbf{W}_\star \mathbf{W}_\star^\top \mathbf{M}\|_F^2 = \mathcal{E}_\star$ .

*Proof.* Recall that by assumption,  $\mathbf{W}$  is a  $m \times k$  nonnegative matrix with orthonormal columns. The subsequent analysis holds even in the case where  $\mathbf{W}$  is allowed to contain all-zero columns, as such columns do not contribute to the objective function and can be ignored effectively reducing the dimension  $k$  of the factorization.

Given a real nonnegative  $m \times k$  matrix  $\mathbf{W}$ , the real  $n \times k$  matrix  $\mathbf{H}$  that minimizes the Frobenius error  $\|\mathbf{M} - \mathbf{W}\mathbf{H}^\top\|_F^2$  over all real  $n \times k$  matrices (ignoring temporarily the fact what we seek a nonnegative  $\mathbf{H}$ ), is given by  $\mathbf{H}^\top = \mathbf{W}^\dagger \mathbf{M}$ , where  $\mathbf{W}^\dagger$  denotes the pseudo-inverse of  $\mathbf{W}$ . Here, however, the columns of  $\mathbf{W}$  are orthonormal and hence  $\mathbf{W}^\dagger = \mathbf{W}^\top$ . Moreover, since  $\mathbf{M}$  is nonnegative,  $\mathbf{H}^\top = \mathbf{W}_\star^\top \mathbf{M} = \mathbf{W}_\star^\top \mathbf{M}$  automatically satisfies the additional nonnegativity constraint. Therefore, the ONMF problem (defined in (1)) reduces to a minimization in a single variable:

$$\mathcal{E}_\star = \min_{\substack{\mathbf{W} \geq \mathbf{0}_{m \times k} \\ \mathbf{W}^\top \mathbf{W} = \mathbf{I}_k}} \|\mathbf{M} - \mathbf{W}\mathbf{W}^\top \mathbf{M}\|_F^2. \quad (7)$$

Expanding the objective in (7),

$$\begin{aligned} \|\mathbf{M} - \mathbf{W}\mathbf{W}^\top \mathbf{M}\|_F^2 &= \|\mathbf{M}\|_F^2 - 2 \cdot \text{Tr}(\mathbf{W}^\top \mathbf{M} \mathbf{M}^\top \mathbf{W}) + \text{Tr}(\mathbf{M}^\top \mathbf{W} \mathbf{W}^\top \mathbf{M}) \\ &= \|\mathbf{M}\|_F^2 - \text{Tr}(\mathbf{W}^\top \mathbf{M} \mathbf{M}^\top \mathbf{W}) \\ &= \|\mathbf{M}\|_F^2 - \|\mathbf{M}^\top \mathbf{W}\|_F^2, \end{aligned} \quad (8)$$

where the first step follows from the cyclic property of the trace and the fact that  $\mathbf{W}^\top \mathbf{W} = \mathbf{I}_k$ . This concludes the proof.  $\square$

#### A.2 Proof of Lemma 1

**Lemma 1.** For any real  $m \times n$  matrix  $\bar{\mathbf{M}}$  with rank  $r$ , desired number of components  $k$ , and accuracy parameter  $\epsilon \in (0, 1)$ , Algorithm 1 outputs  $\bar{\mathbf{W}} \in \mathcal{W}_k$  such that

$$\|\bar{\mathbf{M}}^\top \bar{\mathbf{W}}\|_F^2 \geq (1 - \epsilon) \cdot \|\bar{\mathbf{M}}^\top \bar{\mathbf{W}}_\star\|_F^2,$$

where  $\bar{\mathbf{W}}_\star$  is the optimal solution defined in (3), in time  $T_{\text{SVD}} + O\left(\left(\frac{2}{\epsilon}\right)^{r \cdot k} \cdot k \cdot m\right)$ .

*Proof.* Let  $\bar{\mathbf{M}} = \bar{\mathbf{U}} \bar{\Sigma} \bar{\mathbf{V}}^\top$  denote the truncated eigenvalue decomposition of  $\bar{\mathbf{M}}$ ;  $\bar{\Sigma}$  is a diagonal  $r \times r$  matrix with  $\Sigma_{ii}$  being equal to the  $i$ th largest singular value of  $\bar{\mathbf{M}}$ . For any  $\mathbf{w} \in \mathbb{R}^m$ ,

$$\|\bar{\mathbf{M}}^\top \mathbf{w}\|_2^2 = \|\bar{\mathbf{V}} \bar{\Sigma} \bar{\mathbf{U}}^\top \mathbf{w}\|_2^2 = \|\bar{\Sigma} \bar{\mathbf{U}}^\top \mathbf{w}\|_2^2 \geq \langle \bar{\Sigma} \bar{\mathbf{U}}^\top \mathbf{w}, \mathbf{c} \rangle^2, \quad \forall \mathbf{c} \in \mathbb{R}^r : \|\mathbf{c}\|_2 = 1, \quad (9)$$

where the first equality follows from the fact that the columns of  $\bar{\mathbf{V}}$  are orthonormal and span the entire row space of  $\bar{\mathbf{M}}$ , and the inequality is due to Cauchy-Schwartz. In fact, equality is achieved for  $\mathbf{c}$  colinear to  $\bar{\Sigma} \bar{\mathbf{U}}^\top \mathbf{w}$ , appropriately scaled to unit-length, and hence,

$$\|\bar{\mathbf{M}}^\top \mathbf{w}\|_2^2 = \max_{\mathbf{c} \in \mathbb{S}^{r-1}} \langle \bar{\Sigma} \bar{\mathbf{U}}^\top \mathbf{w}, \mathbf{c} \rangle^2. \quad (10)$$

In turn,

$$\|\bar{\mathbf{M}}^\top \mathbf{W}\|_{\mathbb{F}}^2 = \sum_{j=1}^k \|\bar{\mathbf{M}}^\top \mathbf{w}_j\|_2^2 = \sum_{j=1}^k \max_{\mathbf{c}_j \in \mathbb{S}^{r-1}} \langle \bar{\Sigma} \bar{\mathbf{U}}^\top \mathbf{w}_j, \mathbf{c}_j \rangle^2. \quad (11)$$

Recall that  $\bar{\mathbf{W}}_\star$  by definition maximizes the left hand side of (11) over all  $\mathbf{W} \in \mathcal{W}_k$ . Let  $\tilde{\mathbf{c}}_{\star 1}, \dots, \tilde{\mathbf{c}}_{\star k} \in \mathbb{S}^{r-1}$  be the set of  $k$  vectors achieving equality in (11) for  $\mathbf{W} = \bar{\mathbf{W}}_\star$ , and let  $\tilde{\mathbf{C}}_\star \in \mathbb{R}^{r \times k}$  be the matrix formed by stacking the  $k$  vectors. Algorithm 1 iterates over a set  $\mathcal{N}_{\epsilon/2}^{\otimes k}(\mathbb{S}^{r-1})$  of points ( $r \times k$  matrices)  $\mathbf{C}$ . Recall that  $\mathcal{N}_{\epsilon/2}^{\otimes k}(\mathbb{S}^{r-1})$  is the  $k$ th cartesian power of an  $\epsilon/2$ -net of the  $r$ -dimensional  $\ell_2$ -unit sphere. By construction, the set contains a matrix  $\mathbf{C}_\#$  such that

$$\|\mathbf{C}_\# - \tilde{\mathbf{C}}_\star\|_{\infty, 2} \leq \epsilon/2. \quad (12)$$

Then, for all  $j \in \{1, \dots, k\}$ ,

$$\begin{aligned} \|\bar{\mathbf{M}}^\top \bar{\mathbf{W}}_{\star j}\|_2 &= |\langle \bar{\Sigma} \bar{\mathbf{U}}^\top \bar{\mathbf{W}}_{\star j}, \tilde{\mathbf{c}}_{\star j} \rangle| \\ &= |\langle \bar{\Sigma} \bar{\mathbf{U}}^\top \bar{\mathbf{W}}_{\star j}, \mathbf{c}_{\#j} \rangle + \langle \bar{\Sigma} \bar{\mathbf{U}}^\top \bar{\mathbf{W}}_{\star j}, (\tilde{\mathbf{c}}_{\star j} - \mathbf{c}_{\#j}) \rangle| \\ &\leq |\langle \bar{\Sigma} \bar{\mathbf{U}}^\top \bar{\mathbf{W}}_{\star j}, \mathbf{c}_{\#j} \rangle| + |\langle \bar{\Sigma} \bar{\mathbf{U}}^\top \bar{\mathbf{W}}_{\star j}, (\tilde{\mathbf{c}}_{\star j} - \mathbf{c}_{\#j}) \rangle| \\ &\leq |\langle \bar{\Sigma} \bar{\mathbf{U}}^\top \bar{\mathbf{W}}_{\star j}, \mathbf{c}_{\#j} \rangle| + \|\bar{\Sigma} \bar{\mathbf{U}}^\top \bar{\mathbf{W}}_{\star j}\|_2 \cdot \|\tilde{\mathbf{c}}_{\star j} - \mathbf{c}_{\#j}\|_2 \\ &\leq |\langle \bar{\Sigma} \bar{\mathbf{U}}^\top \bar{\mathbf{W}}_{\star j}, \mathbf{c}_{\#j} \rangle| + (\epsilon/2) \cdot \|\bar{\mathbf{M}}^\top \bar{\mathbf{W}}_{\star j}\|_2. \end{aligned} \quad (13)$$

The first step follows by the definition of  $\tilde{\mathbf{C}}_\star$ , the second by the linearity of the inner product, the third by the triangle inequality, the fourth by Cauchy-Schwarz inequality and the last by the fact that  $\|\tilde{\mathbf{c}}_{\star j} - \mathbf{c}_{\#j}\| \leq \epsilon/2, \forall j \in \{1, \dots, k\}$  (by (12)). Rearranging the terms in (13),

$$|\langle \bar{\Sigma} \bar{\mathbf{U}}^\top \bar{\mathbf{W}}_{\star j}, \mathbf{c}_{\#j} \rangle| \geq (1 - \frac{\epsilon}{2}) \cdot \|\bar{\mathbf{M}}^\top \bar{\mathbf{W}}_{\star j}\|_2 \geq 0,$$

which in turn implies (by taking the square on both sides) that

$$\langle \bar{\Sigma} \bar{\mathbf{U}}^\top \bar{\mathbf{W}}_{\star j}, \mathbf{c}_{\#j} \rangle^2 \geq \|\bar{\mathbf{M}}^\top \bar{\mathbf{W}}_{\star j}\|_2^2 \geq (1 - \epsilon) \cdot \|\bar{\mathbf{M}}^\top \bar{\mathbf{W}}_{\star j}\|_2^2 \quad (14)$$

Summing the terms in (14) over all  $j \in \{1, \dots, k\}$ ,

$$\sum_{j=1}^k \langle \bar{\Sigma} \bar{\mathbf{U}}^\top \bar{\mathbf{W}}_{\star j}, \mathbf{c}_{\#j} \rangle^2 \geq (1 - \epsilon) \cdot \|\bar{\mathbf{M}}^\top \bar{\mathbf{W}}_\star\|_{\mathbb{F}}^2. \quad (15)$$

Let  $\mathbf{W}_\# \in \mathcal{W}_k$  be the candidate solution produced by the algorithm at  $\mathbf{C}_\#$ , i.e.,

$$\mathbf{W}_\# \triangleq \arg \max_{\mathbf{W} \in \mathcal{W}_k} \sum_{j=1}^k \langle \mathbf{w}_j, \bar{\mathbf{U}} \bar{\Sigma} \mathbf{c}_{\#j} \rangle^2 \quad (16)$$

Then,

$$\begin{aligned} \|\bar{\mathbf{M}}^\top \mathbf{W}_\#\| &\stackrel{(\alpha)}{=} \sum_{j=1}^k \max_{\mathbf{c}_j \in \mathbb{S}^{r-1}} \langle \bar{\Sigma} \bar{\mathbf{U}}^\top \bar{\mathbf{W}}_{\#j}, \mathbf{c}_j \rangle^2 \\ &\stackrel{(\beta)}{\geq} \sum_{j=1}^k \langle \bar{\Sigma} \bar{\mathbf{U}}^\top \bar{\mathbf{W}}_{\#j}, \mathbf{c}_{\#j} \rangle^2 \\ &\stackrel{(\gamma)}{\geq} \sum_{j=1}^k \langle \bar{\mathbf{W}}_{\star j}, \bar{\mathbf{U}} \bar{\Sigma} \mathbf{c}_{\#j} \rangle^2 \\ &\stackrel{(\delta)}{\geq} (1 - \epsilon) \cdot \|\bar{\mathbf{M}} \bar{\mathbf{W}}_\star\|_{\mathbb{F}}^2, \end{aligned} \quad (17)$$

where  $(\alpha)$  follows from the observation in (11),  $(\beta)$  from the suboptimality of  $\mathbf{C}_\#$ ,  $(\gamma)$  from the fact that  $\mathbf{W}_\#$  maximizes the sum by its definition in (16), while  $(\delta)$  follows from (15). According to (17), at least one of the candidate solutions produced by Algorithm 1, namely  $\mathbf{W}_\#$ , achieves an objective value within a multiplicative factor  $(1 - \epsilon)$  from the optimal, implying the guarantees of the lemma.

Finally, the running time of Algorithm 1 follows immediately from the cost per iteration and the cardinality of the  $\epsilon/2$ -net on the unit-sphere. Note that matrix multiplications can exploit the available singular value decomposition which is performed once.  $\square$

### A.3 Proof of Theorem 1

We first prove some auxiliary lemmata. The proof of the Theorem is given in the end of this section.

**Lemma 3.** *For any real  $m \times n$  matrices  $\mathbf{M}$  and  $\bar{\mathbf{M}}$ , let*

$$\mathbf{W}_\star \triangleq \arg \max_{\mathbf{W} \in \mathcal{W}_k} \|\mathbf{M}^\top \mathbf{W}\|_F^2 \quad \text{and} \quad \bar{\mathbf{W}}_\star \triangleq \arg \max_{\mathbf{W} \in \mathcal{W}_k} \|\bar{\mathbf{M}}^\top \mathbf{W}\|_F^2, \quad (18)$$

*respectively. Then, for any  $\bar{\mathbf{W}} \in \mathcal{W}_k$  such that  $\|\bar{\mathbf{M}}^\top \bar{\mathbf{W}}\|_F^2 \geq \gamma \cdot \|\bar{\mathbf{M}}^\top \bar{\mathbf{W}}_\star\|_F^2$  for some  $0 < \gamma < 1$ ,*

$$\|\mathbf{M}^\top \bar{\mathbf{W}}\|_F^2 \geq \gamma \cdot \|\mathbf{M}^\top \mathbf{W}_\star\|_F^2 - 2 \cdot k \cdot \|\mathbf{M} - \bar{\mathbf{M}}\|_2^2.$$

*Proof.* By the optimality of  $\bar{\mathbf{W}}_\star$  for  $\bar{\mathbf{M}}$ ,

$$\|\bar{\mathbf{M}}^\top \bar{\mathbf{W}}_\star\|_F^2 \geq \|\bar{\mathbf{M}}^\top \mathbf{W}_\star\|_F^2.$$

In turn, for any  $\bar{\mathbf{W}} \in \mathcal{W}_k$  satisfying the assumptions of the lemma,

$$\|\bar{\mathbf{M}}^\top \bar{\mathbf{W}}\|_F^2 \geq \gamma \cdot \|\bar{\mathbf{M}}^\top \mathbf{W}_\star\|_F^2. \quad (19)$$

Let  $\mathbf{A} \triangleq \mathbf{M}\mathbf{M}^\top$ ,  $\tilde{\mathbf{A}} \triangleq \bar{\mathbf{M}}\bar{\mathbf{M}}^\top$ , and  $\mathbf{E} \triangleq \mathbf{A} - \tilde{\mathbf{A}}$ . By the linearity of the trace,

$$\begin{aligned} \|\bar{\mathbf{M}}^\top \bar{\mathbf{W}}\|_F^2 &= \text{Tr}(\bar{\mathbf{W}}^\top \mathbf{A} \bar{\mathbf{W}}) - \text{Tr}(\bar{\mathbf{W}}^\top \mathbf{E} \bar{\mathbf{W}}) \\ &\leq \text{Tr}(\bar{\mathbf{W}}^\top \mathbf{A} \bar{\mathbf{W}}) + |\text{Tr}(\bar{\mathbf{W}}^\top \mathbf{E} \bar{\mathbf{W}})|. \end{aligned} \quad (20)$$

By Lemma 10,

$$|\text{Tr}(\bar{\mathbf{W}}^\top \mathbf{E} \bar{\mathbf{W}})| \leq \|\bar{\mathbf{W}}\|_F^2 \cdot \|\mathbf{E}\|_2 \leq k \cdot \|\mathbf{E}\|_2 \triangleq R, \quad (21)$$

where the last inequality follows from the fact that  $\|\mathbf{W}\|_F^2 \leq k$  for any  $\mathbf{W} \in \mathcal{W}_k$ . Continuing from (20),

$$\|\bar{\mathbf{M}}^\top \bar{\mathbf{W}}\|_F^2 \leq \text{Tr}(\bar{\mathbf{W}}^\top \mathbf{A} \bar{\mathbf{W}}) + R. \quad (22)$$

Similarly,

$$\begin{aligned} \|\bar{\mathbf{M}}^\top \mathbf{W}_\star\|_F^2 &= \text{Tr}(\mathbf{W}_\star^\top \mathbf{A} \mathbf{W}_\star) - \text{Tr}(\mathbf{W}_\star^\top \mathbf{E} \mathbf{W}_\star) \\ &\geq \text{Tr}(\mathbf{W}_\star^\top \mathbf{A} \mathbf{W}_\star) - |\text{Tr}(\mathbf{W}_\star^\top \mathbf{E} \mathbf{W}_\star)| \\ &\geq \text{Tr}(\mathbf{W}_\star^\top \mathbf{A} \mathbf{W}_\star) - R. \end{aligned} \quad (23)$$

Combining the above, we have

$$\begin{aligned} \text{Tr}(\bar{\mathbf{W}}^\top \mathbf{A} \bar{\mathbf{W}}) &\geq \|\bar{\mathbf{M}}^\top \bar{\mathbf{W}}\|_F^2 - R \\ &\geq \gamma \cdot \|\bar{\mathbf{M}}^\top \mathbf{W}_\star\|_F^2 - R \\ &\geq \gamma \cdot (\text{Tr}(\mathbf{W}_\star^\top \mathbf{A} \mathbf{W}_\star) - R) - R \\ &= \gamma \cdot \text{Tr}(\mathbf{W}_\star^\top \mathbf{A} \mathbf{W}_\star) - (1 + \gamma) \cdot R \\ &\geq \gamma \cdot \text{Tr}(\mathbf{W}_\star^\top \mathbf{A} \mathbf{W}_\star) - 2 \cdot R, \end{aligned}$$

where the first inequality follows from (22) the second from (19), the third from (23), and the last from the fact that  $R \geq 0$  and  $0 < \gamma \leq 1$ . This concludes the proof.  $\square$

**Remark 1.** If in Lemma 3  $\bar{\mathbf{M}}$  is such that  $\mathbf{M}\mathbf{M}^\top - \bar{\mathbf{M}}\bar{\mathbf{M}}^\top$  is PSD, then

$$\|\mathbf{M}^\top \bar{\mathbf{W}}\|_F^2 \geq \gamma \cdot \|\mathbf{M}^\top \mathbf{W}_\star\|_F^2 - \sum_{i=1}^k \lambda_i(\mathbf{M}\mathbf{M}^\top - \bar{\mathbf{M}}\bar{\mathbf{M}}^\top).$$

*Proof.* This follows from the fact that if  $\mathbf{E} \triangleq \mathbf{A} - \tilde{\mathbf{A}}$  is PSD, then

$$\text{Tr}(\tilde{\mathbf{X}}^\top \mathbf{E} \tilde{\mathbf{X}}) = \sum_j \mathbf{x}_j^\top \mathbf{E} \mathbf{x}_j \geq 0,$$

and the bound in (20) can be improved to

$$\begin{aligned} \|\bar{\mathbf{M}}^\top \bar{\mathbf{W}}\|_F^2 &= \text{Tr}(\tilde{\mathbf{X}}^\top \mathbf{A} \tilde{\mathbf{X}}) - \text{Tr}(\tilde{\mathbf{X}}^\top \mathbf{E} \tilde{\mathbf{X}}) \\ &\leq \text{Tr}(\tilde{\mathbf{X}}^\top \mathbf{A} \tilde{\mathbf{X}}). \end{aligned}$$

Further, by Lemma 10 (Corollary 3) the bound in (21) becomes

$$\text{Tr}(\bar{\mathbf{W}}^\top \mathbf{E} \bar{\mathbf{W}}) \leq \|\bar{\mathbf{W}}\|_F^2 \cdot \|\mathbf{E}\|_2 \leq \sum_{i=1}^k \lambda_i(\mathbf{E}).$$

The rest of the proof follows.  $\square$

**Theorem 1.** For any real  $m \times n$  (not necessarily nonnegative) matrix  $\mathbf{M}$  and desired number of components  $k$ , let  $\mathbf{W}_\star \triangleq \arg \max_{\mathbf{W} \in \mathcal{W}_k} \|\mathbf{M}^\top \mathbf{W}\|_F^2$ . Let  $\bar{\mathbf{M}}$  be the best rank- $r$  approximation of  $\mathbf{M}$ . Algorithm 1 with input  $\bar{\mathbf{M}}$  and accuracy parameters  $\epsilon$  and  $r$ , outputs  $\bar{\mathbf{W}} \in \mathcal{W}_k$  such that

$$\|\mathbf{M}^\top \bar{\mathbf{W}}\|_F^2 \geq (1 - \epsilon) \cdot \|\mathbf{M}^\top \mathbf{W}_\star\|_F^2 - k \cdot \|\mathbf{M} - \bar{\mathbf{M}}\|_2^2$$

in time  $T_{\text{SVD}} + O\left(\left(\frac{1}{\epsilon}\right)^{r \cdot k} \cdot k \cdot m\right)$ .

*Proof.* Let  $\bar{\mathbf{W}}$  be the output of Algorithm 1 with input the best rank- $r$  approximation of  $\mathbf{M}$ ,  $\bar{\mathbf{M}}$ . By the guarantees of Algorithm 1, (Lemma 1), the output  $\bar{\mathbf{W}} \in \mathcal{W}_k$  of Algorithm 1 is such that

$$\|\bar{\mathbf{M}}^\top \bar{\mathbf{W}}\|_F^2 \geq (1 - \epsilon) \cdot \|\bar{\mathbf{M}}^\top \mathbf{W}_\star\|_F^2,$$

where  $\bar{\mathbf{W}}_\star \triangleq \arg \max_{\mathbf{W} \in \mathcal{W}_k} \|\bar{\mathbf{M}}^\top \mathbf{W}\|_F^2$ . In turn, by Lemma 3 (and in particular taking into account the remark 1 whose conditions are satisfied since  $\mathbf{M}\mathbf{M}^\top - \bar{\mathbf{M}}\bar{\mathbf{M}}^\top$  is PSD), we have

$$\begin{aligned} \|\mathbf{M}^\top \bar{\mathbf{W}}\|_F^2 &\geq (1 - \epsilon) \cdot \|\mathbf{M}^\top \mathbf{W}_\star\|_F^2 - \sum_{i=1}^k \lambda_i(\mathbf{M}\mathbf{M}^\top - \bar{\mathbf{M}}\bar{\mathbf{M}}^\top) \\ &= (1 - \epsilon) \cdot \|\mathbf{M}^\top \mathbf{W}_\star\|_F^2 - \sum_{i=r+1}^{r+k} \sigma_i^2(\mathbf{M}). \end{aligned} \tag{24}$$

The desired result readily follows.  $\square$

#### A.4 Proof of Theorem 2

**Lemma 4.** For any  $m \times n$  real nonnegative matrix  $\mathbf{M}$ , target dimension  $k$ , and accuracy parameters  $r \in [n]$  and  $\epsilon > 0$ , Algorithm 2 outputs an ONMF pair  $\bar{\mathbf{W}}, \bar{\mathbf{H}}$ , such that

$$\|\mathbf{M} - \bar{\mathbf{W}}\bar{\mathbf{H}}^\top\|_F^2 \leq \mathcal{E}_\star + \epsilon \cdot \sum_{i=1}^k \sigma_i^2(\mathbf{M}) + \sum_{i=r+1}^{r+k} \sigma_i^2(\mathbf{M}),$$

in time  $T_{\text{SVD}} + O\left(\left(\frac{2}{\epsilon}\right)^{r \cdot k} \cdot k \cdot m\right)$ .

*Proof.* Recall that given a real nonnegative  $m \times k$  matrix  $\mathbf{W} \in \mathcal{W}_k$ ,  $\mathbf{H}^\top = \mathbf{W}_*^\top \mathbf{M}$  minimizes the Frobenius error  $\|\mathbf{M} - \mathbf{W}\mathbf{H}^\top\|_F^2$  over the set of real nonnegative  $n \times k$  matrices (Proof of Lemma 2). In turn, for any  $\mathbf{W} \in \mathcal{W}_k$ , and  $\mathbf{H}$  selected as above,

$$\|\mathbf{M} - \mathbf{W}\mathbf{H}^\top\|_F^2 = \|\mathbf{M}\|_F^2 - \|\mathbf{M}^\top \mathbf{W}\|_F^2. \quad (25)$$

Let  $\bar{\mathbf{W}}$  be the output of Algorithm 1, for input matrix  $\mathbf{M}_r$  the best rank- $r$  approximation of  $\mathbf{M}$ . That is, in the sequel of this proof,  $\bar{\mathbf{M}} = \mathbf{M}_r$ . By the guarantees of Algorithm 1, (Lemma 1), the output  $\bar{\mathbf{W}} \in \mathcal{W}_k$  of Algorithm 1 is such that

$$\|\mathbf{M}_r^\top \bar{\mathbf{W}}\|_F^2 \geq (1 - \epsilon) \cdot \|\mathbf{M}_r^\top \mathbf{W}_*\|_F^2,$$

where  $\mathbf{W}_* \triangleq \arg \max_{\mathbf{W} \in \mathcal{W}_k} \|\mathbf{M}_r^\top \mathbf{W}\|_F^2$ . In turn, by Lemma 3 (and in particular taking into account the remark 1 whose conditions are satisfied since  $\mathbf{M}\mathbf{M}^\top - \mathbf{M}_r\mathbf{M}_r^\top$  is PSD), we have

$$\begin{aligned} \|\mathbf{M}^\top \bar{\mathbf{W}}\|_F^2 &\geq (1 - \epsilon) \cdot \|\mathbf{M}^\top \mathbf{W}_*\|_F^2 - \sum_{i=1}^k \lambda_i(\mathbf{M}\mathbf{M}^\top - \mathbf{M}_r\mathbf{M}_r^\top) \\ &= (1 - \epsilon) \cdot \|\mathbf{M}^\top \mathbf{W}_*\|_F^2 - \sum_{i=r+1}^{r+k} \sigma_i^2(\mathbf{M}). \end{aligned} \quad (26)$$

Given the output  $\bar{\mathbf{W}}$  of Algorithm 1, Algorithm 2 outputs the pair  $\bar{\mathbf{W}}, \bar{\mathbf{H}}^\top \triangleq \bar{\mathbf{W}}^\top \mathbf{M}$ . By (25), for this choice of  $\bar{\mathbf{H}}$ , taking into account (26),

$$\begin{aligned} \|\mathbf{M} - \bar{\mathbf{W}}\bar{\mathbf{H}}^\top\|_F^2 &= \|\mathbf{M}\|_F^2 - \|\mathbf{M}^\top \bar{\mathbf{W}}\|_F^2 \\ &\leq \|\mathbf{M}\|_F^2 - (1 - \epsilon) \cdot \|\mathbf{M}^\top \mathbf{W}_*\|_F^2 + \sum_{i=r+1}^{r+k} \sigma_i^2(\mathbf{M}) \\ &= \|\mathbf{M}\|_F^2 - \|\mathbf{M}^\top \mathbf{W}_*\|_F^2 + \epsilon \cdot \|\mathbf{M}^\top \mathbf{W}_*\|_F^2 + \sum_{i=r+1}^{r+k} \sigma_i^2(\mathbf{M}) \\ &= \|\mathbf{M} - \mathbf{W}_*\mathbf{H}_*^\top\|_F^2 + \epsilon \cdot \|\mathbf{M}^\top \mathbf{W}_*\|_F^2 + \sum_{i=r+1}^{r+k} \sigma_i^2(\mathbf{M}) \\ &= \|\mathbf{M} - \mathbf{W}_*\mathbf{H}_*^\top\|_F^2 + \epsilon \cdot \sum_{i=1}^k \sigma_i^2(\mathbf{M}) + \sum_{i=r+1}^{r+k} \sigma_i^2(\mathbf{M}), \end{aligned}$$

where the last inequality follows by Lemma 10. This completes the proof.  $\square$

**Theorem 2.** For any  $m \times n$  real nonnegative matrix  $\mathbf{M}$ , target dimension  $k$ , and desired accuracy  $0 < \epsilon < 1$ , Algorithm 2 with parameters  $\epsilon$  and  $r = \lceil k/\epsilon \rceil$  outputs an ONMF pair  $\mathbf{W}, \mathbf{H}$ , such that

$$\|\mathbf{M} - \mathbf{W}\mathbf{H}^\top\|_F^2 \leq \mathcal{E}_* + \epsilon \cdot \|\mathbf{M}\|_F^2,$$

in time  $T_{\text{SVD}} + \left(\frac{1}{\epsilon}\right)^{(k^2/\epsilon)} \cdot (k \cdot m)$ .

*Proof.* By Lemma 4, Algorithm 2 with parameters  $r$  and  $\epsilon$ , outputs an ONMF pair  $\bar{\mathbf{W}}, \bar{\mathbf{H}}$ , such that

$$\|\mathbf{M} - \bar{\mathbf{W}}\bar{\mathbf{H}}^\top\|_F^2 \leq \mathcal{E}_* + \epsilon \cdot \sum_{i=1}^k \sigma_i^2(\mathbf{M}) + \sum_{i=r+1}^{r+k} \sigma_i^2(\mathbf{M}). \quad (27)$$

Noting that for  $k < r$  the  $k$  (squared) singular values  $\sigma_i^2(\mathbf{M})$ ,  $i = r+1, \dots, r+k$  are the smallest among the  $r$  (squared) singular values  $\sigma_i^2(\mathbf{M})$ ,  $i = k+1, \dots, r+k$ , the last term in the right-hand side can be upper bounded as follows:

$$\sum_{i=r+1}^{r+k} \sigma_i^2(\mathbf{M}) \leq \frac{k}{r} \cdot \sum_{i=k+1}^{r+k} \sigma_i^2(\mathbf{M}). \quad (28)$$

For  $r = \lceil k/\epsilon \rceil$ , and combining the (28) and (27), we have

$$\begin{aligned}\|\mathbf{M} - \overline{\mathbf{W}}\overline{\mathbf{H}}^\top\|_{\text{F}}^2 &\leq \mathcal{E}_* + \epsilon \cdot \sum_{i=1}^k \sigma_i^2(\mathbf{M}) + \epsilon \cdot \sum_{i=k+1}^{r+k} \sigma_i^2(\mathbf{M}) \\ &= \mathcal{E}_* + \epsilon \cdot \sum_{i=1}^{r+k} \sigma_i^2(\mathbf{M}) \\ &\leq \mathcal{E}_* + \epsilon \cdot \|\mathbf{M}\|_{\text{F}}^2,\end{aligned}$$

which is the desired guarantee. The time complexity readily follows from the steps of Algorithm 2 and that of Algorithm 1, which concludes the proof.  $\square$

### A.5 Correctness of Algorithm 3

**Lemma 5.** *For any  $m \times k$  matrix  $\mathbf{A}$ , Algorithm 3 outputs the  $m \times k$  nonnegative matrix*

$$\widehat{\mathbf{W}} = \arg \max_{\mathbf{W} \in \mathcal{W}_k} \sum_{j=1}^k \langle \mathbf{w}_j, \mathbf{a}_j \rangle^2,$$

in time  $O(2^k \cdot k \cdot m)$ .

*Proof.* Let  $\mathcal{I}_j \subseteq [m]$ ,  $j = 1 \dots, k$  denote the supports of the  $k$  columns of optimal solution  $\widehat{\mathbf{W}}$ . The orthogonality requirements (in conjunction with nonnegativity) imply that the supports  $\mathcal{I}_j$ ,  $j = 1, \dots, k$  are disjoint. Further, it is straightforward to verify that due to the nonnegativity constraints in  $\mathcal{W}_k$ , the support of the  $j$ th column,  $\mathcal{I}_j$ , must contain only indices corresponding to nonnegative or nonpositive entries of  $\mathbf{a}_j$ , but not a combination of both. Algorithm 3 considers all  $2^k$  sign combinations for the support sets, e.g.,  $\mathcal{I}_1$  containing positive entries,  $\mathcal{I}_2$  negative, etc., by equivalently solving the maximization on all  $2^k$  matrices  $\hat{\mathbf{A}} = \mathbf{A} \cdot \text{diag}(\mathbf{s})$ ,  $\mathbf{s} \in \{\pm 1\}^k$  and returning the solution that performs best on the original input  $\mathbf{A}$ . Therefore, without loss of generality, in the sequel we assume that all support sets correspond to nonnegative entries of  $\mathbf{A}$ .

If an oracle reveals the supports  $\mathcal{I}_j$ ,  $j = 1, \dots, k$ , the exact value of  $\widehat{\mathbf{X}}$  can be readily determined, according to the Cauchy-Schwarz inequality: the  $j$ th column,  $\hat{\mathbf{x}}_j$ , is supported only on  $\mathcal{I}_j$ , and its nonzero sub-vector is set to  $(\hat{\mathbf{x}}_j)_{\mathcal{I}_j} = [\mathbf{a}_j]_{\mathcal{I}_j} / \|\mathbf{a}_j\|$ , which maximizes the inner product with the corresponding sub-vector of  $\mathbf{a}_j$ . In turn, the objective function attains value equal to

$$\sum_{j=1}^k (\hat{\mathbf{x}}_j^\top \mathbf{a}_j)^2 = \sum_{j=1}^k \sum_{i \in \mathcal{I}_j} A_{ij}^2, \quad (29)$$

where the first equality stems from the fact that  $[\mathbf{a}_j]_{\mathcal{I}_j} \geq \mathbf{0}$ . It suffices to show that Alg. 3 correctly determines the collection of support sets  $\mathcal{I}_j$ ,  $j = 1, \dots, k$ .

Alg. 3 constructs the collection of support sets  $\mathcal{I}_j$ ,  $j = 1, \dots, k$ , according to the following rule:

$$i \in \mathcal{I}_j \Leftrightarrow A_{ij} > \max\{0, A_{iw}\}, \quad \forall w \in [k] \setminus \{j\}, \quad (30)$$

i.e., index  $i \in [m]$  is assigned to the support of the  $j$ th column if and only if  $A_{ij}$  is positive and the largest entry in the  $i$ th row of  $\mathbf{A}$ . Note that any procedure to construct supports that satisfy the requirements described in the beginning of this proof would assign each index  $i \in [m]$  to at most one of the sets  $\mathcal{I}_j$ ,  $j \in \{1, \dots, k\}$ , while it would need to ensure that  $i \in \mathcal{I}_j$  if and only if  $A_{ij} > 0$ . The rule in (30) additionally requires that index  $i \in [m]$  is assigned to  $\mathcal{I}_j$  if and only if  $A_{ij}$  is the largest (positive) entry in the  $i$ th row of  $\mathbf{A}$ .

Assume, for the sake of contradiction, that there exists a set of optimal supports  $\mathcal{I}_j$ ,  $j = 1, \dots, k$  which does not adhere to the rule in (30), i.e., there exist  $u \in [k]$  and  $q \in [m]$ , such  $q \in \mathcal{I}_u$ , while  $0 < A_{qu} < A_{qv}$  for some  $v \in [k]$ ,  $v \neq u$ . Consider a collection of supports  $\tilde{\mathcal{I}}_j$ ,  $j = 1, \dots, k$ , with

$$\tilde{\mathcal{I}}_j = \mathcal{I}_j, \quad \forall j \in [k] \setminus \{u, v\}, \quad \tilde{\mathcal{I}}_u = \mathcal{I}_u \setminus \{q\} \quad \text{and} \quad \tilde{\mathcal{I}}_v = \mathcal{I}_v \cup \{q\}. \quad (31)$$

Note that the collection of supports in (31) satisfies the desired constraints. Further, the objective value achieved for the new supports (according to (29)) is equal to

$$\sum_{j=1}^k \sum_{i \in \tilde{\mathcal{I}}_j} A_{ij}^2 = \sum_{j=1}^k \sum_{i \in \mathcal{I}_j} A_{ij}^2 - A_{qu}^2 + A_{qv}^2 > \sum_{j=1}^k \sum_{i \in \mathcal{I}_j} A_{ij}^2,$$

contradicting the optimality of the collection  $\mathcal{I}_j$ ,  $j = 1, \dots, k$ . We conclude that the collection of optimal support sets must satisfy (30).

The construction of the support sets according to (30) requires determining the largest entry of each of the  $m$  rows of  $\mathbf{A}$ , which can be done in  $O(km)$ . Once the supports are determined, each of the  $k$  columns of  $\hat{\mathbf{X}}$  is constructed in  $O(m)$ . Taking into account that the above procedure is repeated  $2^k$  times for each of the sign patterns, the desired result follows.  $\square$

## B Auxiliary Technical Results

**Lemma 6.** *For any real  $m \times n$  matrix  $\mathbf{M}$ , and any  $r, k \leq \min\{m, n\}$ ,*

$$\sum_{i=r+1}^{r+k} \sigma_i(\mathbf{M}) \leq \frac{k}{\sqrt{r+k}} \cdot \|\mathbf{M}\|_F,$$

where  $\sigma_i(\mathbf{M})$  is the  $i$ th largest singular value of  $\mathbf{M}$ .

*Proof.* By the Cauchy-Schwartz inequality,

$$\sum_{i=r+1}^{r+k} \sigma_i(\mathbf{M}) = \sum_{i=r+1}^{r+k} |\sigma_i(\mathbf{M})| \leq \left( \sum_{i=r+1}^{r+k} \sigma_i^2(\mathbf{M}) \right)^{1/2} \cdot \|\mathbf{1}_k\|_2 = \sqrt{k} \cdot \left( \sum_{i=r+1}^{r+k} \sigma_i^2(\mathbf{M}) \right)^{1/2}.$$

Note that  $\sigma_{r+1}(\mathbf{M}), \dots, \sigma_{r+k}(\mathbf{M})$  are the  $k$  smallest among the  $r+k$  largest singular values. Hence,

$$\sum_{i=r+1}^{r+k} \sigma_i^2(\mathbf{M}) \leq \frac{k}{r+k} \sum_{i=1}^{r+k} \sigma_i^2(\mathbf{M}) \leq \frac{k}{r+k} \sum_{i=1}^{\min\{m,n\}} \sigma_i^2(\mathbf{M}) = \frac{k}{r+k} \|\mathbf{M}\|_F^2.$$

Combining the two inequalities, the desired result follows.  $\square$

**Corollary 1.** *For any real  $m \times n$  matrix  $\mathbf{M}$  and  $k \leq \min\{m, n\}$ ,  $\sigma_k(\mathbf{M}) \leq k^{-1/2} \cdot \|\mathbf{M}\|_F$ .*

*Proof.* It follows immediately from Lemma 6.  $\square$

**Lemma 7.** *Let  $a_1, \dots, a_n$  and  $b_1, \dots, b_n$  be  $2n$  real numbers and let  $p$  and  $q$  be two numbers such that  $1/p + 1/q = 1$  and  $p > 1$ . We have*

$$\left| \sum_{i=1}^n a_i b_i \right| \leq \left( \sum_{i=1}^n |a_i|^p \right)^{1/p} \cdot \left( \sum_{i=1}^n |b_i|^q \right)^{1/q}.$$

**Lemma 8.** *For any  $\mathbf{A}, \mathbf{B} \in \mathbb{R}^{n \times k}$ ,*

$$|\langle \mathbf{A}, \mathbf{B} \rangle| \triangleq |\text{Tr}(\mathbf{A}^\top \mathbf{B})| \leq \|\mathbf{A}\|_F \|\mathbf{B}\|_F.$$

*Proof.* The inequality follows from Lemma 7 for  $p = q = 2$ , treating  $\mathbf{A}$  and  $\mathbf{B}$  as vectors.  $\square$

**Lemma 9.** *For any two real matrices  $\mathbf{A}$  and  $\mathbf{B}$  of appropriate dimensions,*

$$\|\mathbf{AB}\|_F \leq \min\{\|\mathbf{A}\|_2 \|\mathbf{B}\|_F, \|\mathbf{A}\|_F \|\mathbf{B}\|_2\}.$$

*Proof.* Let  $\mathbf{b}_i$  denote the  $i$ th column of  $\mathbf{B}$ . Then,

$$\|\mathbf{AB}\|_F^2 = \sum_i \|\mathbf{Ab}_i\|_2^2 \leq \sum_i \|\mathbf{A}\|_2^2 \|\mathbf{b}_i\|_2^2 = \|\mathbf{A}\|_2^2 \sum_i \|\mathbf{b}_i\|_2^2 = \|\mathbf{A}\|_2^2 \|\mathbf{B}\|_F^2.$$

Similarly, using the previous inequality,

$$\|\mathbf{AB}\|_F^2 = \|\mathbf{B}^\top \mathbf{A}^\top\|_F^2 \leq \|\mathbf{B}^\top\|_2^2 \|\mathbf{A}^\top\|_F^2 = \|\mathbf{B}\|_2^2 \|\mathbf{A}\|_F^2.$$

Combining the two upper bounds, the desired result follows.  $\square$

**Corollary 2.** Let  $\mathbf{M}_r$  denote the best rank- $r$  approximation of  $\mathbf{M}$ , obtained by the truncated singular value decomposition of  $\mathbf{M}$ . Then, for any  $d > r$ ,  $\sigma_d \leq \|\mathbf{M} - \mathbf{M}_r\|_F / \sqrt{d - r}$ .

*Proof.* By definition

$$\|\mathbf{M} - \mathbf{M}_r\|_F^2 = \sum_{i=r+1}^n \sigma_i^2 \geq \sum_{i=r+1}^d \sigma_i^2 \geq (d - r) \cdot \sigma_d^2,$$

from which the desired result follows.  $\square$

**Lemma 10.** For any real  $m \times n$  matrix  $\mathbf{A}$ , and any  $k \leq \min\{m, n\}$ ,

$$\max_{\substack{\mathbf{Y} \in \mathbb{R}^{n \times k} \\ \mathbf{Y}^\top \mathbf{Y} = \mathbf{I}_k}} \|\mathbf{AY}\|_F = \left( \sum_{i=1}^k \sigma_i^2(\mathbf{A}) \right)^{1/2}.$$

Equality is realized for  $\mathbf{Y}$  coinciding with the  $k$  leading right singular vectors of  $\mathbf{A}$ .

*Proof.* Let  $\mathbf{U}\Sigma\mathbf{V}^\top$  be the singular value decomposition of  $\mathbf{A}$ ;  $\mathbf{U}$  and  $\mathbf{V}$  are  $m \times m$  and  $n \times n$  unitary matrices respectively, while  $\Sigma$  is a diagonal matrix with  $\Sigma_{jj} = \sigma_j$ , the  $j$ th largest singular value of  $\mathbf{A}$ ,  $j = 1, \dots, d$ , where  $d \triangleq \min\{m, n\}$ . Due to the invariance of the Frobenius norm under unitary multiplication,

$$\|\mathbf{AY}\|_F^2 = \|\mathbf{U}\Sigma\mathbf{V}^\top \mathbf{Y}\|_F^2 = \|\Sigma\mathbf{V}^\top \mathbf{Y}\|_F^2. \quad (32)$$

Continuing from (32),

$$\|\Sigma\mathbf{V}^\top \mathbf{Y}\|_F^2 = \text{Tr}(\mathbf{Y}^\top \mathbf{V} \Sigma^2 \mathbf{V}^\top \mathbf{Y}) = \sum_{i=1}^k \mathbf{y}_i^\top \left( \sum_{j=1}^d \sigma_j^2 \cdot \mathbf{v}_j \mathbf{v}_j^\top \right) \mathbf{y}_i = \sum_{j=1}^d \sigma_j^2 \cdot \sum_{i=1}^k (\mathbf{v}_j^\top \mathbf{y}_i)^2.$$

Let  $z_j \triangleq \sum_{i=1}^k (\mathbf{v}_j^\top \mathbf{y}_i)^2$ ,  $j = 1, \dots, d$ . Note that each individual  $z_j$  satisfies

$$0 \leq z_j \triangleq \sum_{i=1}^k (\mathbf{v}_j^\top \mathbf{y}_i)^2 \leq \|\mathbf{v}_j\|^2 = 1,$$

where the last inequality follows from the fact that the columns of  $\mathbf{Y}$  are orthonormal. Further,

$$\sum_{j=1}^d z_j = \sum_{j=1}^d \sum_{i=1}^k (\mathbf{v}_j^\top \mathbf{y}_i)^2 = \sum_{i=1}^k \sum_{j=1}^d (\mathbf{v}_j^\top \mathbf{y}_i)^2 = \sum_{i=1}^k \|\mathbf{y}_i\|^2 = k.$$

Combining the above, we conclude that

$$\|\mathbf{AY}\|_F^2 = \sum_{j=1}^d \sigma_j^2 \cdot z_j \leq \sigma_1^2 + \dots + \sigma_k^2. \quad (33)$$

Finally, it is straightforward to verify that if  $\mathbf{y}_i = \mathbf{v}_i$ ,  $i = 1, \dots, k$ , then (33) holds with equality.  $\square$



**Corollary 3.** For any real  $m \times m$  PSD matrix  $\mathbf{A}$ , and  $k \times m$  matrix  $\mathbf{X}$  with  $k \leq m$  orthonormal columns,

$$\text{Tr}(\mathbf{X}^\top \mathbf{A} \mathbf{X}) = \sum_{i=1}^k \lambda_i(\mathbf{A})$$

where  $\lambda_i(\mathbf{A})$  is the  $i$ th largest eigenvalue of  $\mathbf{A}$ . Equality is achieved for  $\mathbf{X}$  coinciding with the  $k$  leading eigenvectors of  $\mathbf{A}$ .

*Proof.* Let  $\mathbf{A} = \mathbf{V}\mathbf{V}^\top$  be a factorization of the PSD matrix  $\mathbf{A}$ . Then,  $\text{Tr}(\mathbf{X}^\top \mathbf{A} \mathbf{X}) = \text{Tr}(\mathbf{X}^\top \mathbf{V}\mathbf{V}^\top \mathbf{X}) = \|\mathbf{V}^\top \mathbf{X}\|_F^2$ . The desired result follows by Lemma 10 and the fact that  $\lambda_i(\mathbf{A}) = \sigma_i^2(\mathbf{V})$ ,  $i = 1, \dots, m$ .  $\square$

## C Net of the $\ell_2$ -unit sphere

In this section, we provide a simple probabilistic construction of an  $\epsilon$ -net of the  $\ell_2$ -unit sphere  $\mathbb{S}_2^{d-1}$ , i.e., the set of points  $\mathbf{x}$  such that  $\|\mathbf{x}\|_2 = 1$ .

**Lemma 11** ([34], Lemma 5.2). For any  $\epsilon > 0$ , there exists an  $\epsilon$ -net  $\mathcal{N}_\epsilon$  of the unit Euclidean sphere  $\mathbb{S}_2^{d-1}$  equipped with the Euclidean metric, such that

$$m_\epsilon \triangleq |\mathcal{N}_\epsilon| \leq (1 + 2/\epsilon)^d.$$

*Proof.* Let  $\mathcal{N}_\epsilon$  be a maximal  $\epsilon$ -separated subset of  $\mathbb{S}_2^{d-1}$ . In other words,  $d(x, y) \geq \epsilon$  for all  $x, y \in \mathcal{N}_\epsilon$ ,  $x \neq y$ , and no set containing  $\mathcal{N}_\epsilon$  has this property.

Such a set can be constructed iteratively: select an arbitrary point on the sphere and at each subsequent step select a point that is at distance at least  $\epsilon$  from all previously selected points. By the compactness of the sphere, the iterative construction process will terminate after a finite number of steps, and the resulting set will satisfy the above properties.

The maximality property, implies that  $\mathcal{N}_\epsilon$  is an  $\epsilon$ -net of  $\mathbb{S}_2^{d-1}$ . If this was not the case, then there would exist an  $x \in \mathbb{S}_2^{d-1}$  such that  $d(x, y) > \epsilon$ ,  $\forall y \in \mathcal{N}_\epsilon$ . The  $\mathcal{N}_\epsilon \cup \{x\}$  would be an  $\epsilon$ -separated set, that contains  $\mathcal{N}_\epsilon$ , contradicting the maximality of the latter.

By the separation property, we infer that the balls of radius  $\epsilon/2$  centered at the points of  $\mathcal{N}_\epsilon$  are disjoint. This follows from the triangle inequality. Further, all such balls lie in the ball  $(1 + \epsilon/2)\mathbb{B}_2^d$ , where  $\mathbb{B}_2^d$  denotes the unit Euclidean ball centered at the origin. Comparing the volumes, we have

$$\text{Vol}(\tfrac{\epsilon}{2}\mathbb{B}_2^d) \cdot |\mathcal{N}_\epsilon| \leq \text{Vol}((1 + \tfrac{\epsilon}{2})\mathbb{B}_2^d).$$

Taking into account that  $\text{Vol}(r \cdot \mathbb{B}_2^d) = r^d \cdot \text{Vol}(\mathbb{B}_2^d)$ ,

$$|\mathcal{N}_\epsilon| \leq (1 + \tfrac{\epsilon}{2})^d / (\tfrac{\epsilon}{2})^d = (1 + \tfrac{2}{\epsilon})^d,$$

which is the desired result.  $\square$

Lemma 11 regards the unit Euclidean sphere. However, the sequence of arguments used in the proof essentially hold for the case of the unit ball  $\mathbb{B}_2^d$ , i.e., there exists an  $\epsilon$ -net of  $\mathbb{B}_2^d$ , with at most  $(1 + 2/\epsilon)^d$  points.

**Constructing an  $\epsilon$ -net of the unit sphere.** There are many constructions for  $\epsilon$ -nets on the sphere, both deterministic and randomized. In the following we review a simple randomized construction, initially studied by Wyner [35] in the asymptotic  $d \rightarrow \infty$  regime.

By Lemma 11, there exists an  $\epsilon$ -net  $\mathcal{N}_\epsilon$  of  $\mathbb{S}_2^{d-1}$ . Consider the balls of radii  $\epsilon$  centered at the points of  $\mathcal{N}_\epsilon$ . The balls cover all points of  $\mathbb{S}_2^{d-1}$ ; if there existed a point  $x$  on  $\mathbb{S}_2^{d-1}$  not included in any ball, it would imply that this point is at distance at least  $\epsilon$  from all points of  $\mathcal{N}_\epsilon$  contradicting the fact that  $\mathcal{N}_\epsilon$  is a  $\epsilon$ -net.

The intersection of each of the previous balls with  $\mathbb{S}_2^{d-1}$  is a spherical cap, and hence, according to the above, the collection of spherical caps covers  $\mathbb{S}_2^{d-1}$ . (Note that the spherical caps, as well as the balls, overlap.)

Consider a set  $\mathcal{Q}$ , containing at least one point from each spherical cap. Then,  $\mathcal{Q}$  is a  $2\epsilon$ -net of  $\mathbb{S}_2^{d-1}$ . To verify that, note the following. Consider a point  $x \in \mathbb{S}_2^{d-1}$ . By construction,  $\mathcal{N}_\epsilon$  contains a point  $y$  such that  $d(x, y) \leq \epsilon$ . Consider the spherical cap centered at  $y$ . By definition,  $\mathcal{Q}$  contains a point  $\tilde{y}$  in that spherical cap, and hence  $d(y, \tilde{y}) \leq \epsilon$ . By triangle inequality, it follows that  $d(x, \tilde{y}) \leq 2\epsilon$ . Since the point  $x$  is arbitrary, we conclude that  $\mathcal{Q}$  is a  $2\epsilon$ -net.

We draw points randomly and independently, uniformly distributed on  $\mathbb{S}_2^{d-1}$ . This can be accomplished, for instance, by randomly and independently generating vectors in  $\mathbb{R}^d$  distributed according to the multivariate normal distribution  $N(\mathbf{0}, \mathbf{I})$  and normalizing their length to 1. A randomly selected point lies in a specific spherical cap with probability  $p \geq 1/m_\epsilon$ . By a standard probability arguments (Coupon collector's problem),  $O(m_\epsilon \ln(m_\epsilon/\delta))$  points uniformly distributed over  $\mathbb{S}_2^{d-1}$  suffice for at least one random point to lie in each sphere cap with probability at least  $1 - \delta$ . Substituting the value of  $m_\epsilon$  from Lemma 11, we find that  $O(d\epsilon^{-d} \cdot \ln \frac{1}{\epsilon\delta})$  suffice to form a  $2\epsilon$ -net, with probability at least  $1 - \delta$ . Note that  $\delta$  can be chosen to scale with the dimension  $n$  of the problem.

**Lemma 12.** *A set of  $O(d(\epsilon/2)^{-d} \cdot \ln \frac{2}{\epsilon\delta})$  randomly and independently drawn points uniformly distributed on  $\mathbb{S}_2^{d-1}$  suffices to construct an  $\epsilon$ -net of  $\mathbb{S}_2^{d-1}$  with probability at least  $1 - \delta$ .*

## D Additional Experimental Results

| Component 1       | Component 2 | Component 3 | Component 4 | Component 5 |
|-------------------|-------------|-------------|-------------|-------------|
| american          | coach       | add         | ago         | billion     |
| attack            | game        | cup         | called      | business    |
| campaign          | games       | food        | com         | companies   |
| country           | guy         | hour        | family      | company     |
| government        | hit         | large       | help        | cost        |
| group             | left        | makes       | high        | deal        |
| leader            | night       | minutes     | home        | industry    |
| official          | play        | oil         | look        | market      |
| political         | player      | pepper      | need        | million     |
| president         | point       | serving     | part        | money       |
| zzz_al_gore       | run         | small       | problem     | number      |
| zzz_bush          | season      | sugar       | program     | percent     |
| zzz_george_bush   | team        | tablespoon  | right       | plan        |
| zzz_u_s           | win         | teaspoon    | school      | stock       |
| zzz_united_states | won         | water       | show        | system      |

Table 3: ONMF with  $r=5$  orthogonal components ( $102 \cdot 10^3$ -dimensional vectors) on the words-by-document matrix of the NY Times bag-of-words dataset [33]. The table depicts the words corresponding to the 15 largest entries of each component. The 5 retrieved components are extremely sparse: 90% of their mass is concentrated in 134, 35, 65, 269 and 59 entries, respectively.

**Large-scale text analysis: clustering words.** We evaluate the performance of ONMF S as a clustering algorithm on the NY Times bag-of-words dataset [33]. The dataset is represented by a  $102\text{K} \times 300\text{K}$  words-by-articles matrix. Given an approximate ONMF of that matrix, the  $102\text{K} \times k$  nonnegative, orthogonal factor  $\mathbf{W}$  induces an assignment of words to  $r$  clusters, which in this case can be interpreted as *topics*. That is, each column of  $\mathbf{W}$  suggests a topic, defined by the words corresponding to its nonzero entries.

We run ONMF S with target dimension  $k = 5$  topics, and accuracy parameter  $r = 5$ , while we configure it to stop if no progress is observed after  $T = 300$  consecutive candidate solutions. Table 3 lists the words corresponding to the 15 largest entries of each orthogonal component (column of  $\mathbf{W}$ ). Arguably, each component can be interpreted as a distinct topic, illustrating the potential of ONMF in text analysis. Further, we note that although the components of  $\mathbf{W}$  are not explicitly restricted to

be sparse, they tend to be: 90% of the  $\ell_2$  mass of each component is concentrated in approximately 100-200 entries (words) out of the roughly 102K present in the dataset.

## Appendix References

- [34] Roman Vershynin. Introduction to the non-asymptotic analysis of random matrices. *arXiv preprint arXiv:1011.3027*, 2010.
- [35] Aaron D Wyner. Random packings and coverings of the unit n-sphere. *Bell System Technical Journal*, 46(9):2111–2118, 1967.
